# Supplementary material
Source: PubMed Central journal article supplement (PMC3188607)

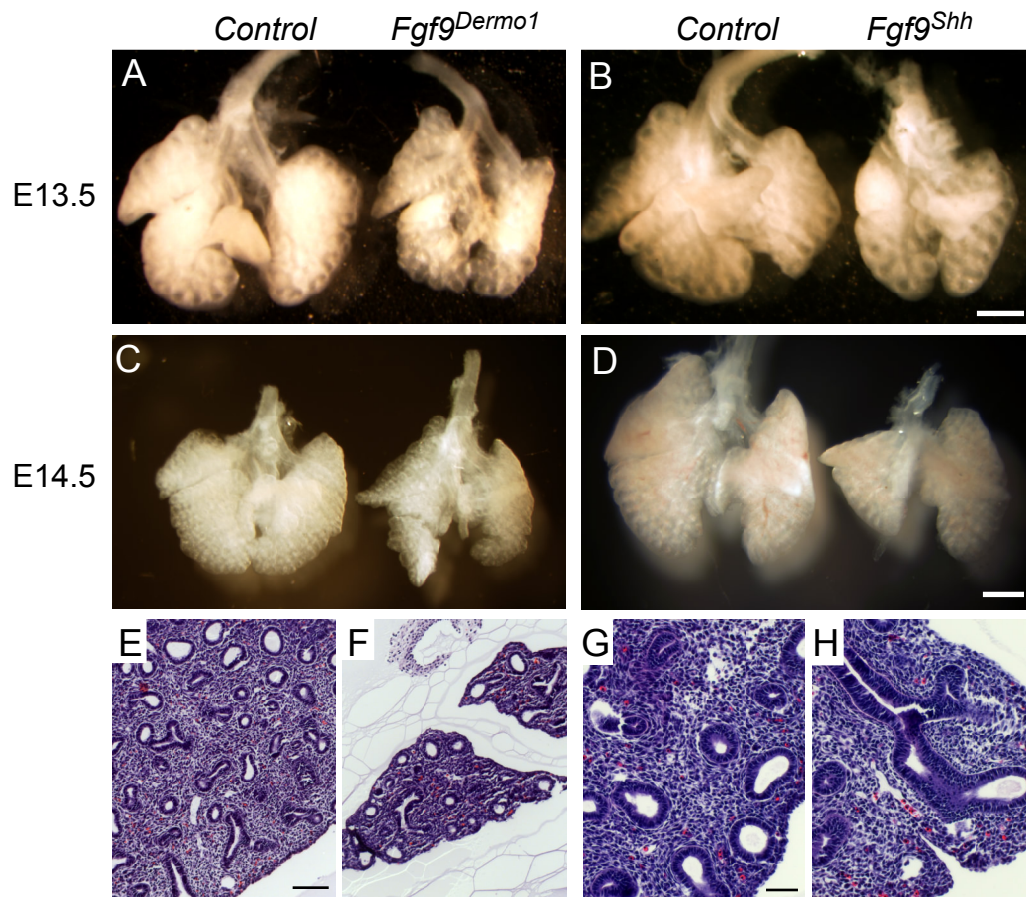

Supplement: supp_138.15.3169_DEV065110FigS1.pdf [file supp_138.15.3169_DEV065110FigS1.pdf]

*control*

$\beta$ -catenin<sup>Dermo1</sup>

*Fgf9*<sup>-/-</sup>

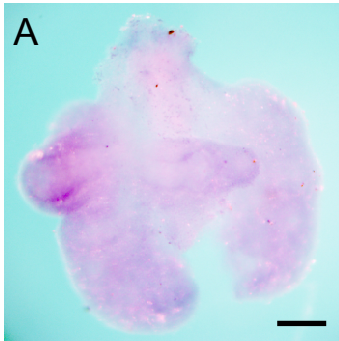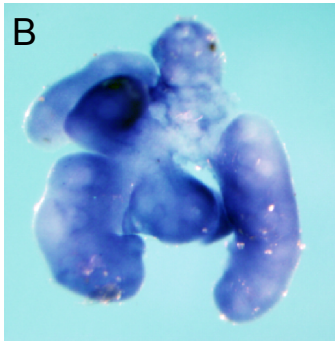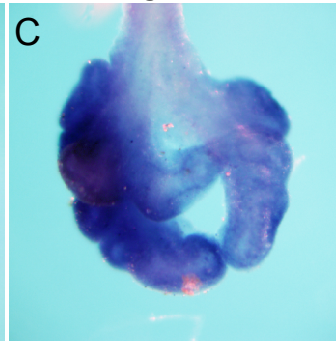

*Noggin*  
E12.5

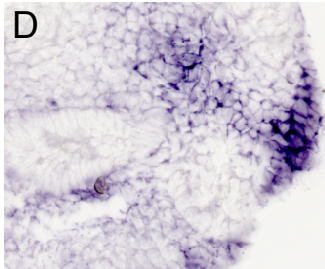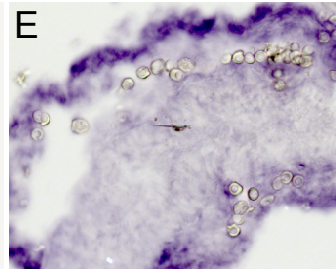

Supplement: supp_138.15.3169_DEV065110FigS2.pdf [file supp_138.15.3169_DEV065110FigS2.pdf]
